# Supplementary figures and images for: Variable Energy and Ultrasound–based Liposculpture of the Arms: Multicenter and Multidevice Study
Source: PubMed Central journal article supplement — Plast Reconstr Surg Glob Open. 2024 Mar 19;12(3):e5649. doi: 10.1097/GOX.0000000000005649 (PMC11213598; doi:10.1097/gox.0000000000005649), 2024-03-19

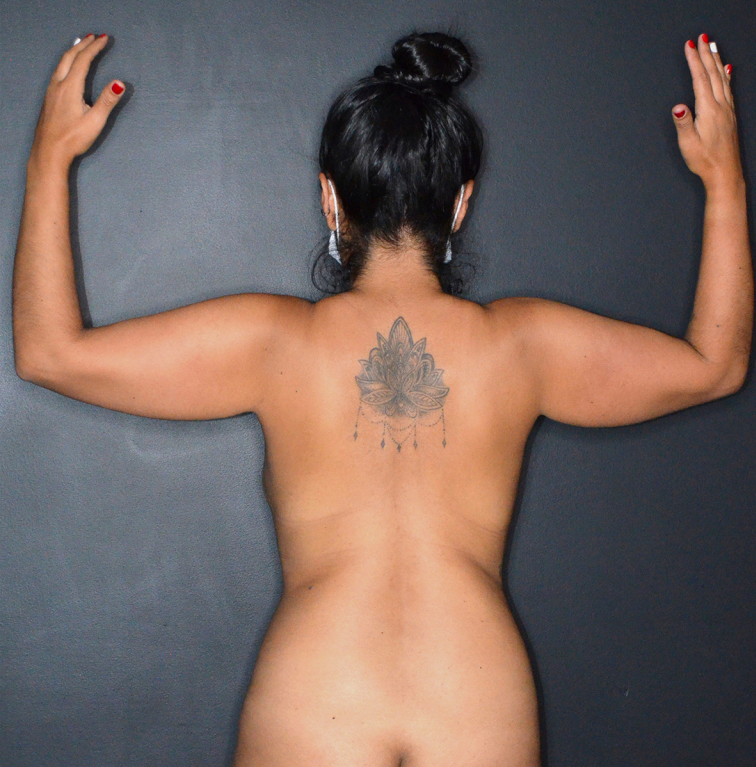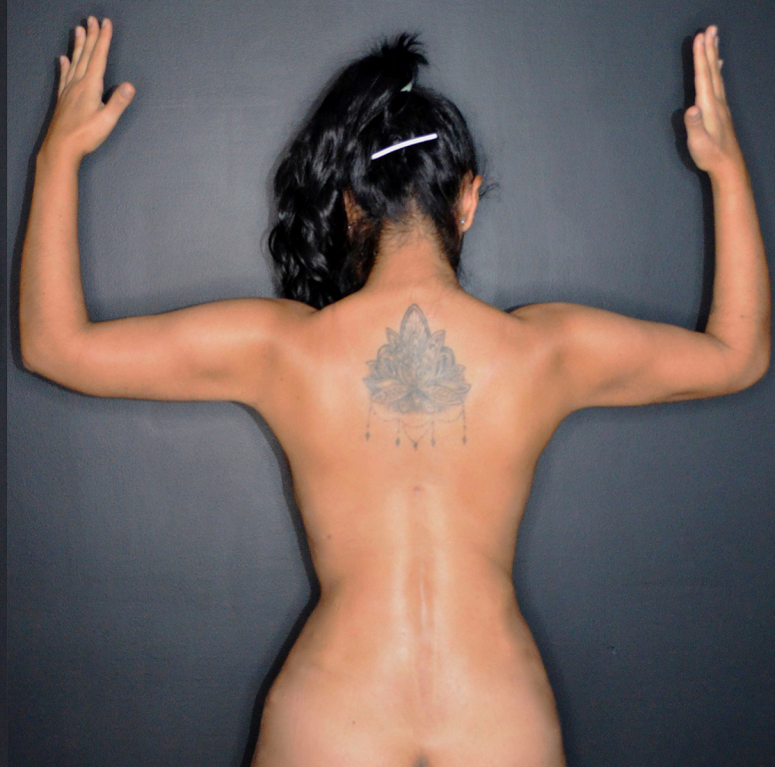

Supplement: gox-12-e5649-s003.pdf [file gox-12-e5649-s003.pdf]

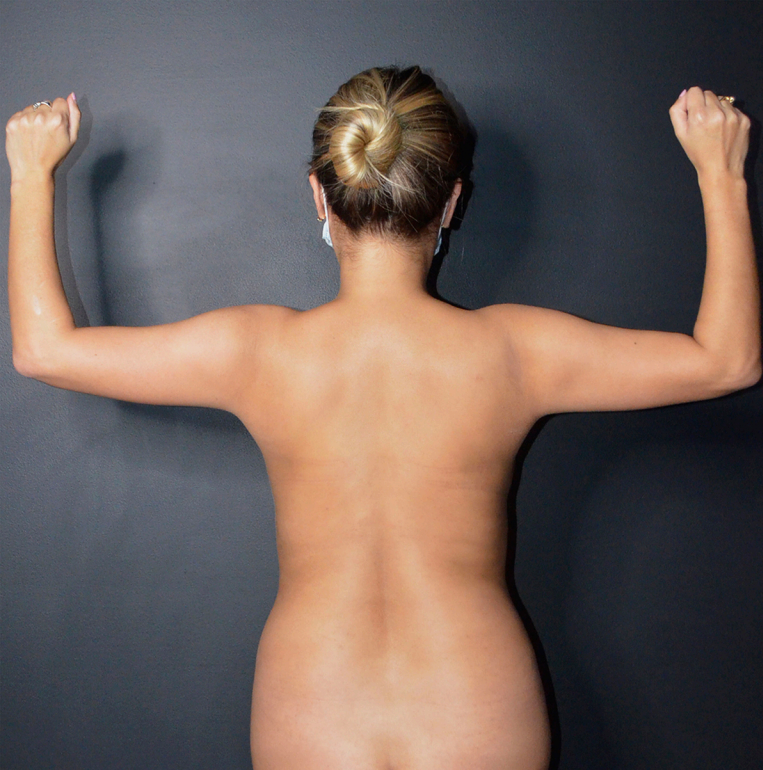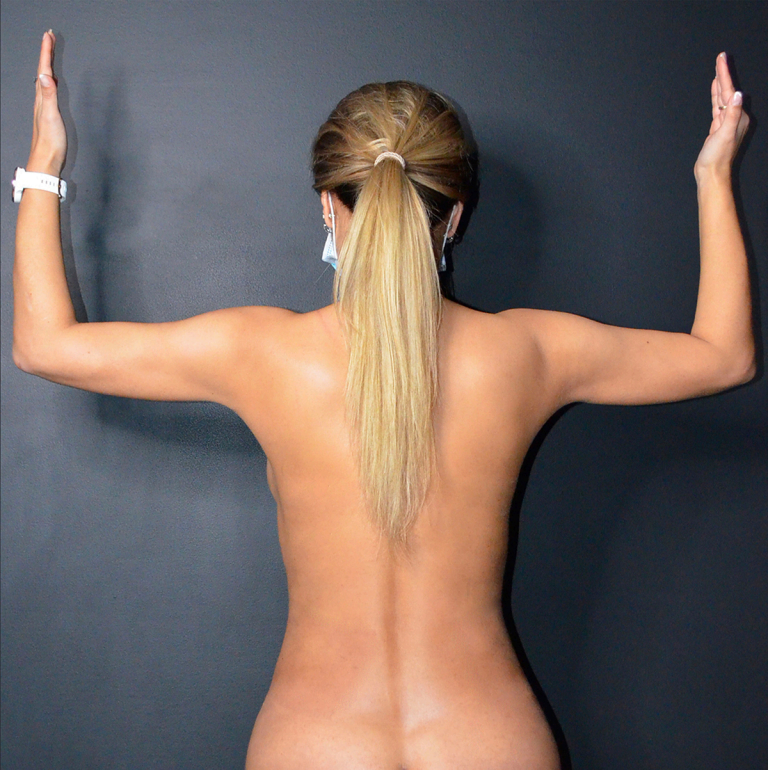

Supplement: gox-12-e5649-s004.pdf [file gox-12-e5649-s004.pdf]
